# Supplementary material for: Genomic Determinants Potentially Associated with Clinical Manifestations of Human-Pathogenic Tick-Borne Flaviviruses
Source: MDPI journal article supplement (doi:10.3390/ijms232113404), 2022-11-02
Supplement: s1 [file s1]

| Protein | Position   | Mean $F_{st}$ | Enc residue           | Hem residue            | LGTV residue | Number of LGTV sequences | Highly specific | Absolutely specific |
|---------|------------|---------------|-----------------------|------------------------|--------------|--------------------------|-----------------|---------------------|
| M       | 9          | 0.916         | K <sub>(87/22)</sub>  | R <sub>(78/13)</sub>   | R            | 3                        |                 |                     |
|         | 145        | 0.950         | L <sub>(98/0)</sub>   | M <sub>(98/2)</sub>    | L            | 3                        |                 |                     |
| E       | <b>76*</b> | 1.000         | T <sub>(100/0)</sub>  | A <sub>(100/0)</sub>   | T            | 3                        |                 |                     |
|         | 130        | 0.958         | H <sub>(88/16)</sub>  | Y <sub>(84/12)</sub>   | Y            | 3                        |                 |                     |
|         | 176        | 0.958         | M <sub>(78/22)</sub>  | L <sub>(78/22)</sub>   | L            | 3                        |                 |                     |
|         | 335        | 0.937         | T <sub>(77/22)</sub>  | S <sub>(78/22)</sub>   | T            | 3                        |                 |                     |
|         | 364        | 0.989         | I <sub>(100/1)</sub>  | M <sub>(99/0)</sub>    | M            | 3                        |                 |                     |
|         | <b>457</b> | 1.000         | K <sub>(100/0)</sub>  | R <sub>(100/0)</sub>   | K            | 3                        |                 |                     |
| NS1     | 148        | 0.926         | R <sub>(92/0)</sub>   | K <sub>(100/8)</sub>   | R            | 3                        |                 |                     |
|         | 161        | 0.976         | V <sub>(99/0)</sub>   | M <sub>(99/0)</sub>    | I            | 3                        |                 |                     |
|         | 262        | 0.937         | S <sub>(84/22)</sub>  | A <sub>(78/16)</sub>   | A            | 3                        |                 |                     |
|         | 274        | 0.950         | I <sub>(80/22)</sub>  | L <sub>(78/19)</sub>   | V            | 3                        |                 |                     |
| NS2a    | 52         | 0.943         | R <sub>(62/0)</sub>   | T <sub>(100/0)</sub>   | S            | 3                        |                 |                     |
|         | 155        | 0.926         | L <sub>(90/17)</sub>  | Y <sub>(78/0)</sub>    | L            | 3                        |                 |                     |
| NS2b    | 33         | 0.947         | V <sub>(89/8)</sub>   | A <sub>(92/0)</sub>    | L            | 3                        |                 |                     |
|         | <b>63</b>  | 0.99          | E <sub>(99.4/0)</sub> | D <sub>(100/0)</sub>   | E            | 3                        |                 |                     |
| NS3     | 314        | 0.958         | K <sub>(89/15)</sub>  | R <sub>(85/11)</sub>   | R            | 3                        |                 |                     |
|         | 404        | 0.947         | D <sub>(77/22)</sub>  | E <sub>(78/22)</sub>   | K/R          | 1/2                      |                 |                     |
|         | 584        | 0.958         | R <sub>(96/8)</sub>   | K <sub>(92/4)</sub>    | R            | 3                        |                 |                     |
| NS4a    | 56         | 0.916         | M <sub>(87/22)</sub>  | V <sub>(78/13)</sub>   | F/L          | 1/2                      |                 |                     |
| NS4b    | 54         | 0.916         | I <sub>(86/22)</sub>  | M <sub>(78/14)</sub>   | M            | 3                        |                 |                     |
|         | 208        | 0.947         | L <sub>(100/0)</sub>  | V <sub>(80/0)</sub>    | L            | 3                        |                 |                     |
| NS5     | 20         | 0.916         | K <sub>(68/24)</sub>  | R <sub>(76/32)</sub>   | K            | 3                        |                 |                     |
|         | 31         | 0.926         | I <sub>(90/18)</sub>  | V <sub>(82/10)</sub>   | V            | 3                        |                 |                     |
|         | 44         | 0.919         | R <sub>(96/7)</sub>   | K <sub>(93/3)</sub>    | K            | 3                        |                 |                     |
|         | 113        | 0.916         | K <sub>(84/7)</sub>   | R <sub>(93/16)</sub>   | R            | 3                        |                 |                     |
|         | 162        | 0.958         | K <sub>(75/22)</sub>  | R <sub>(78/25)</sub>   | R            | 3                        |                 |                     |
|         | <b>226</b> | 1.000         | T <sub>(100/0)</sub>  | S <sub>(100/0)</sub>   | T            | 3                        |                 |                     |
|         | 260        | 0.920         | V <sub>(82/22)</sub>  | T <sub>(78/14)</sub>   | V            | 3                        |                 |                     |
|         | <b>290</b> | 1.000         | E <sub>(99.6/0)</sub> | D <sub>(100/0.4)</sub> | D            | 3                        |                 |                     |
|         | 404        | 0.958         | K <sub>(78/22)</sub>  | R <sub>(78/22)</sub>   | R            | 3                        |                 |                     |
|         | 590        | 0.958         | I <sub>(80/22)</sub>  | V <sub>(78/20)</sub>   | V            | 3                        |                 |                     |
|         | 696        | 0.950         | H <sub>(78/22)</sub>  | P <sub>(78/22)</sub>   | P            | 3                        |                 |                     |
|         | 854        | 0.947         | K <sub>(96/0)</sub>   | R <sub>(100/4)</sub>   | G            | 3                        |                 |                     |
|         | 872        | 0.979         | K <sub>(96/4)</sub>   | R <sub>(96/4)</sub>    | K/R          | 1/2                      |                 |                     |
|         | 890        | 0.960         | D <sub>(99/0)</sub>   | E <sub>(100/0)</sub>   | D            | 3                        |                 |                     |

Blue color – encephalitic form

Red color – hemorrhagic form

Green color – unique LGTV aa residues

\* - absolutely specific positions are bolded
